# Supplementary material for: Analysis of Two Complementary Single-Gene Deletion Mutant Libraries of Salmonella Typhimurium in Intraperitoneal Infection of BALB/c Mice
Source: PubMed Central journal article supplement (PMC4700939; doi:10.3389/fmicb.2015.01455), 2016-01-05
Supplement: Table4.pdf [file Table4.pdf]

**Table S4. Primers used in this study.**

| <b>Primer</b>                                                       | <b>Sequence</b>                  |
|---------------------------------------------------------------------|----------------------------------|
| <b>Amplification for hybridization</b>                              |                                  |
| CCT <sub>24</sub> VN                                                | CCTTTTTTTTTTTTTTTTTTTTTTTTTTTVN  |
| FRT-Out3_1                                                          | TTCCTATACTTTCTAGAGAA             |
| FRT-Out3_2                                                          | TAGGAACTTCGGAATAGGAA             |
| <b>Cloning of <i>STM0286</i>, <i>STM0551</i> and <i>STM2363</i></b> |                                  |
| STM0286_ <i>Bam</i> HI_out5                                         | GTCTGGATCCGCAGATCGCTTCGCTGCTGAC  |
| STM0286_ <i>Eco</i> RI_out3                                         | TTCTGAATTCTCCTGCACAGGCAGACATAAAC |
| STM0551_ <i>Bam</i> HI_out5                                         | GTCTGGATCCTCACTTAAC TTTTACAAGG   |
| STM0551_ <i>Eco</i> RI_out3                                         | TTCTGAATTCCCTGCTTTTTCCATTGCT     |
| STM2363_ <i>Bam</i> HI_out5                                         | GTCTGGATCCGAGATAAAAAGTGTGATGGC   |
| STM2363_ <i>Eco</i> RI_out3                                         | TTCTGAATTCTAAGCCACATCTCAGAACCTG  |
| pBAD-F                                                              | ATGCCATAGCATT TTTTATCCA          |
| pBAD-R                                                              | GATTTAATCTGTATCAGG               |
